# Supplementary material for: N-Methyl-2-pyrrolidone assisted synthesis of hierarchical ZSM-5 with house-of-cards-like structure
Source: Royal Society of Chemistry journal article supplement (doi:10.1039/c4ra02022g), 2014-01-01
Supplement: c4ra02022g1.pdf [file c4ra02022g1.pdf]

## Supporting Information

### **N-methyl-2-pyrrolidone assisted synthesis of hierarchical ZSM-5 with house-of-cards-like structure**

Lijia Liu, Hongbin Wang, Runwei Wang, Chuanyin Sun, Shangjing Zeng, Shang  
Jiang, Daliang Zhang, Liangkui Zhu and Zongtao Zhang\*

*State Key Laboratory of Inorganic Synthesis and Preparative Chemistry, Jilin  
University, Changchun 130012, P. R. China*

E-mail: [zzhang@jlu.edu.cn](mailto:zzhang@jlu.edu.cn)

#### **Raw materials**

All reagents were used without any further purification. Fumed silica (SiO<sub>2</sub>) was purchased from Shenyang Chemical Company (China). Sodium hydroxide (NaOH) and aluminum sulfate (Al<sub>2</sub>(SO<sub>4</sub>)<sub>3</sub>·18H<sub>2</sub>O) were supplied by Beijing Chemical Reagent Company (China). N-methyl-2-pyrrolidone (NMP) was obtained from Tianjin Chemical Reagent Company (China).

#### **Synthesis**

House-of-cards-like ZSM-5 (HCL-ZSM-5) was prepared via a one-pot hydrothermal process. The homogeneous gel with a molar composition of 0.2 Na<sub>2</sub>O: 0.025 Al<sub>2</sub>O<sub>3</sub>: SiO<sub>2</sub>: 17.8 H<sub>2</sub>O: 0.808 NMP was firstly obtained. Then the mixture was transferred into an autoclave and crystallized at 140 °C for 6-72 h. The product was collected by filtration, washed with deionized water and dried at 70 °C. For comparison, template free ZSM-5 was prepared with the same procedure used for HCL-ZSM-5, but in the absence of NMP. H form ZSM-5 was obtained through ion exchange with 1 M NH<sub>4</sub>NO<sub>3</sub> solution under 80 °C before calcination (550 °C, 6 h).

### **Characterizations**

X-ray diffraction (XRD) data were recorded on a Rigaku D/MAX-2550 diffractometer (50 kV, 200 mA) with Cu K $\alpha$ . Radiation ( $\lambda=1.5418$  Å). The morphologies of samples were examined on a JEOL JSM-6700F scanning electron microscopy (SEM) and JEOL JSM-3010 transmission electron microscopy (TEM). The spectra of solid-state <sup>27</sup>Al NMR and liquid-state <sup>13</sup>C NMR were collected on Varian Infinity Plus 400 and Bruker Avance 500 spectrometers, respectively. Nitrogen absorption-desorption isotherms were performed on a Micromeritics ASAP 2020M instrument at 77 K. The specific surface area was evaluated using the Brunauer-Emmett-Teller (BET) equation, and the external surface area was calculated from t-plot analysis. The pore size distribution was obtained by non-local density functional theory (NLDFT) model.

The amounts of Si and Al in zeolites were quantified by inductively coupled plasma (ICP) with a Perkin-Elmer 3300 DV spectrometer. Temperature-programmed desorption of ammonia (TPD-NH<sub>3</sub>) curve was measured on a Micromeritics Auto Chem II 2920 automated chemisorption analysis unit with a thermal conductivity detector (TCD).

### **Catalytic tests**

Cumene and 1, 3, 5-triisopropylbenzene (TIPB) cracking evaluations of the catalysts were performed in a micro-fixed bed reactor by pulse injection under atmospheric pressure at 300 °C and 350 °C, respectively. Nitrogen was used as carrier gas. 0.05 g of catalyst was firstly placed in the fixed reactor, then 0.4 µL of reactant (cumene or TIPB) was injected for each run. The reaction products were analyzed by an on-line gas chromatograph (Shimadzu GC-8A) equipped with a thermal conductivity detector (TCD).

Supporting Figures

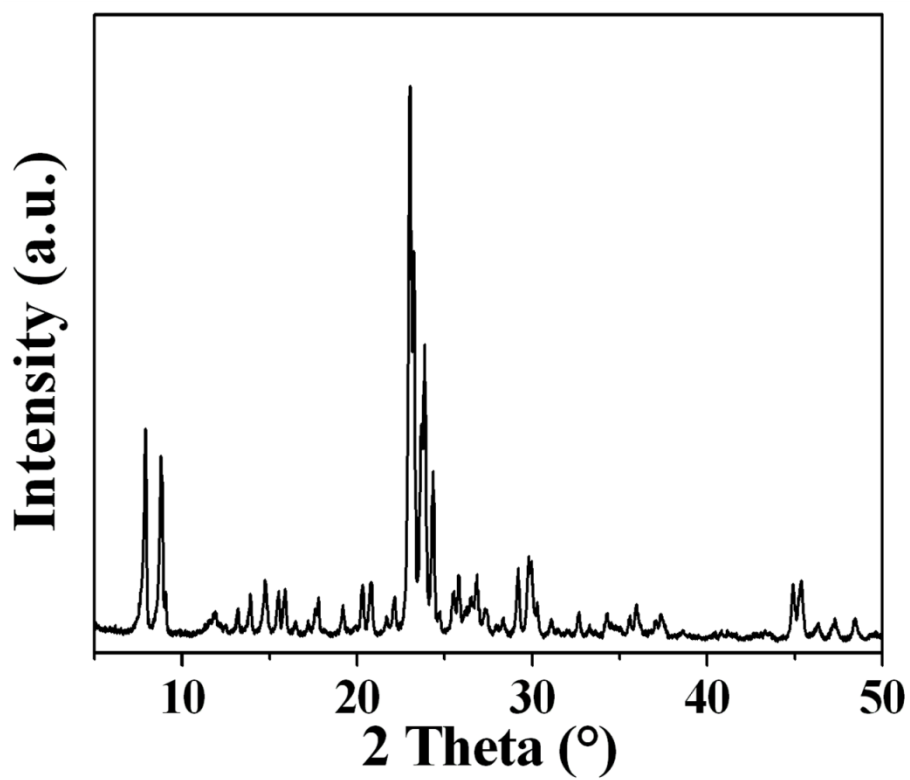

Figure S1. XRD pattern of template free ZSM-5.

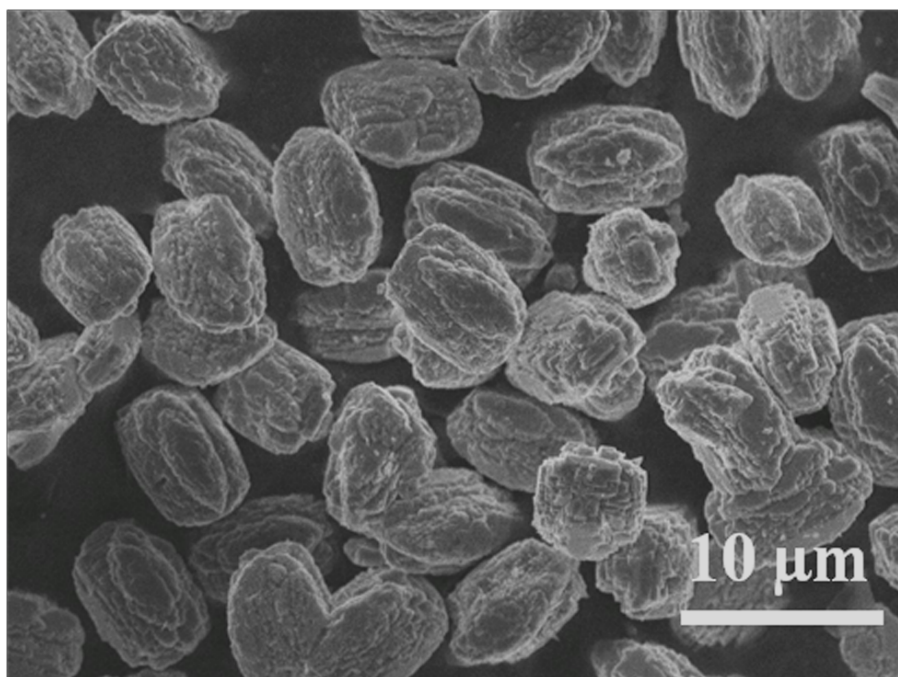

**Figure S2.** SEM image of template free ZSM-5.
